# Supplementary material
Source: Springer Nature journal article supplement (https://www.springermedizin.de/resource/supplementary/13054_2012_556_MOESM6_ESM.pdf/9708802)

**A**

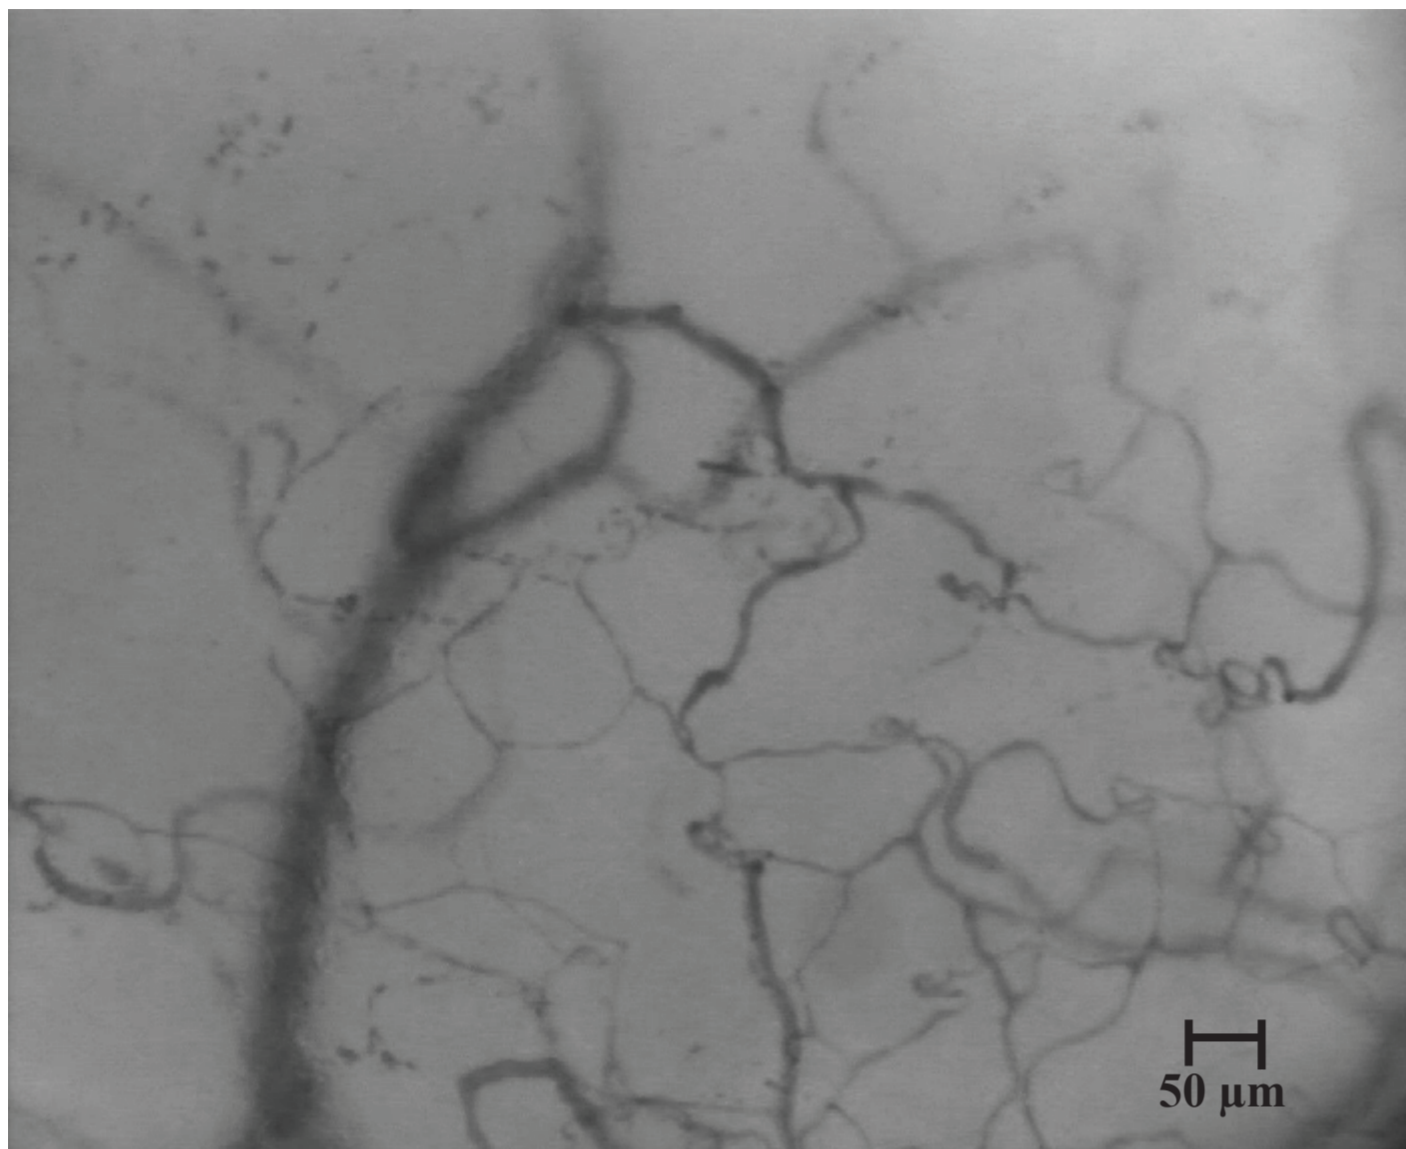

**B**

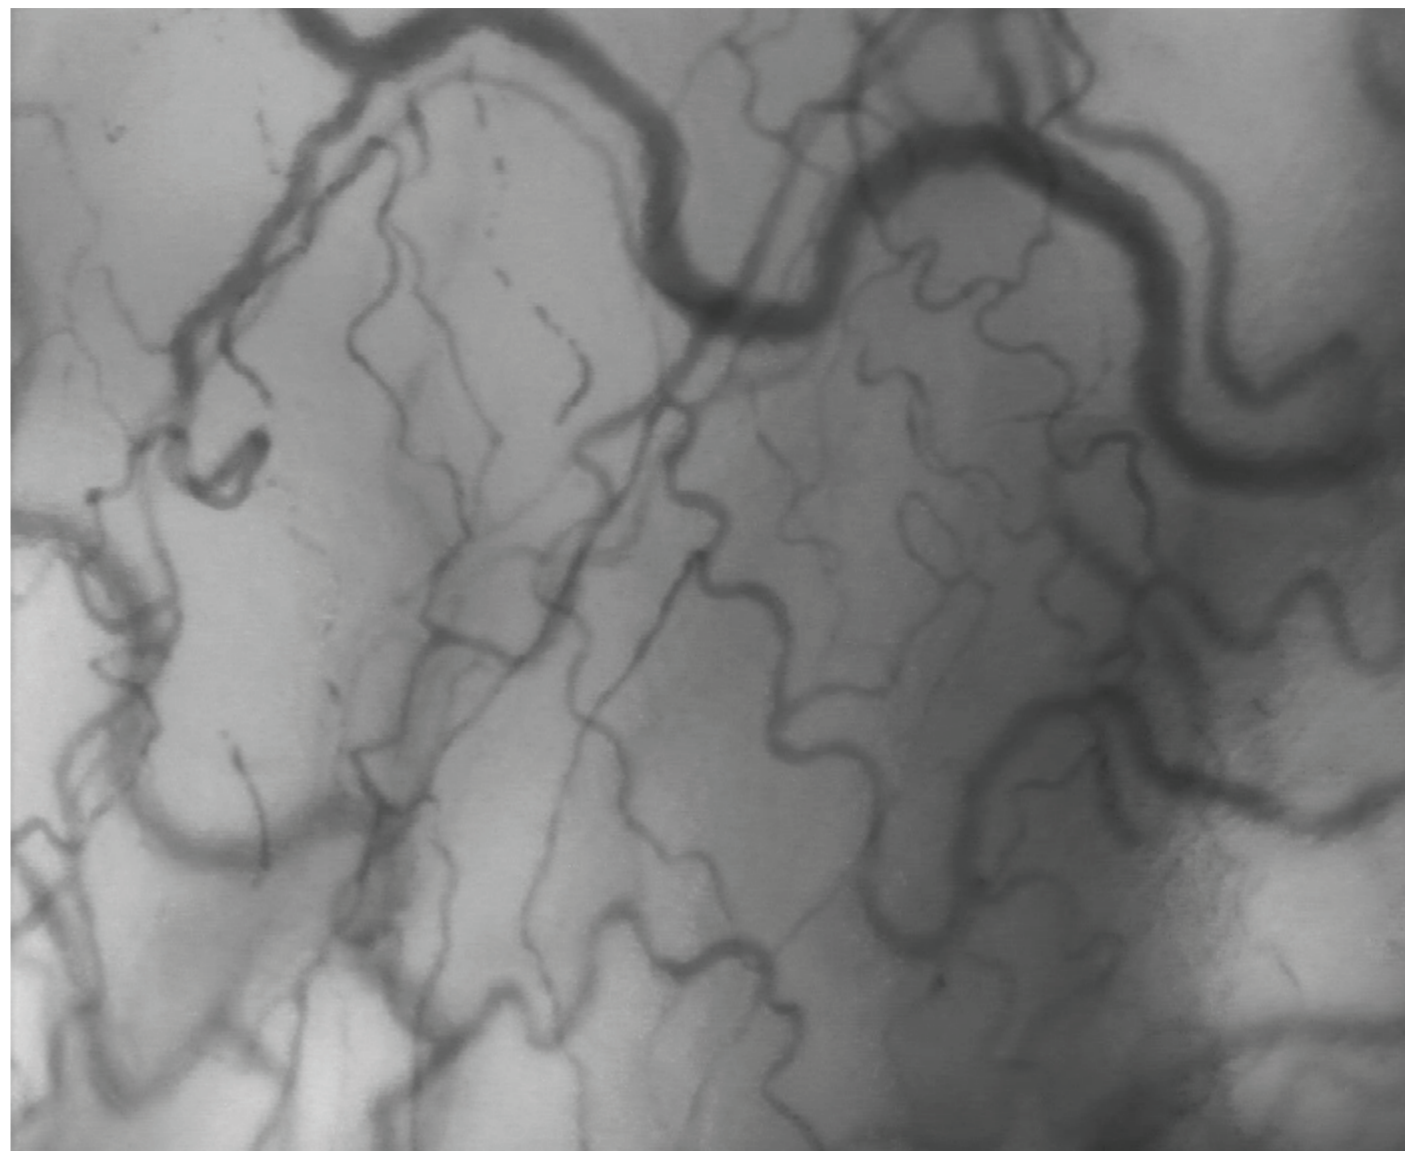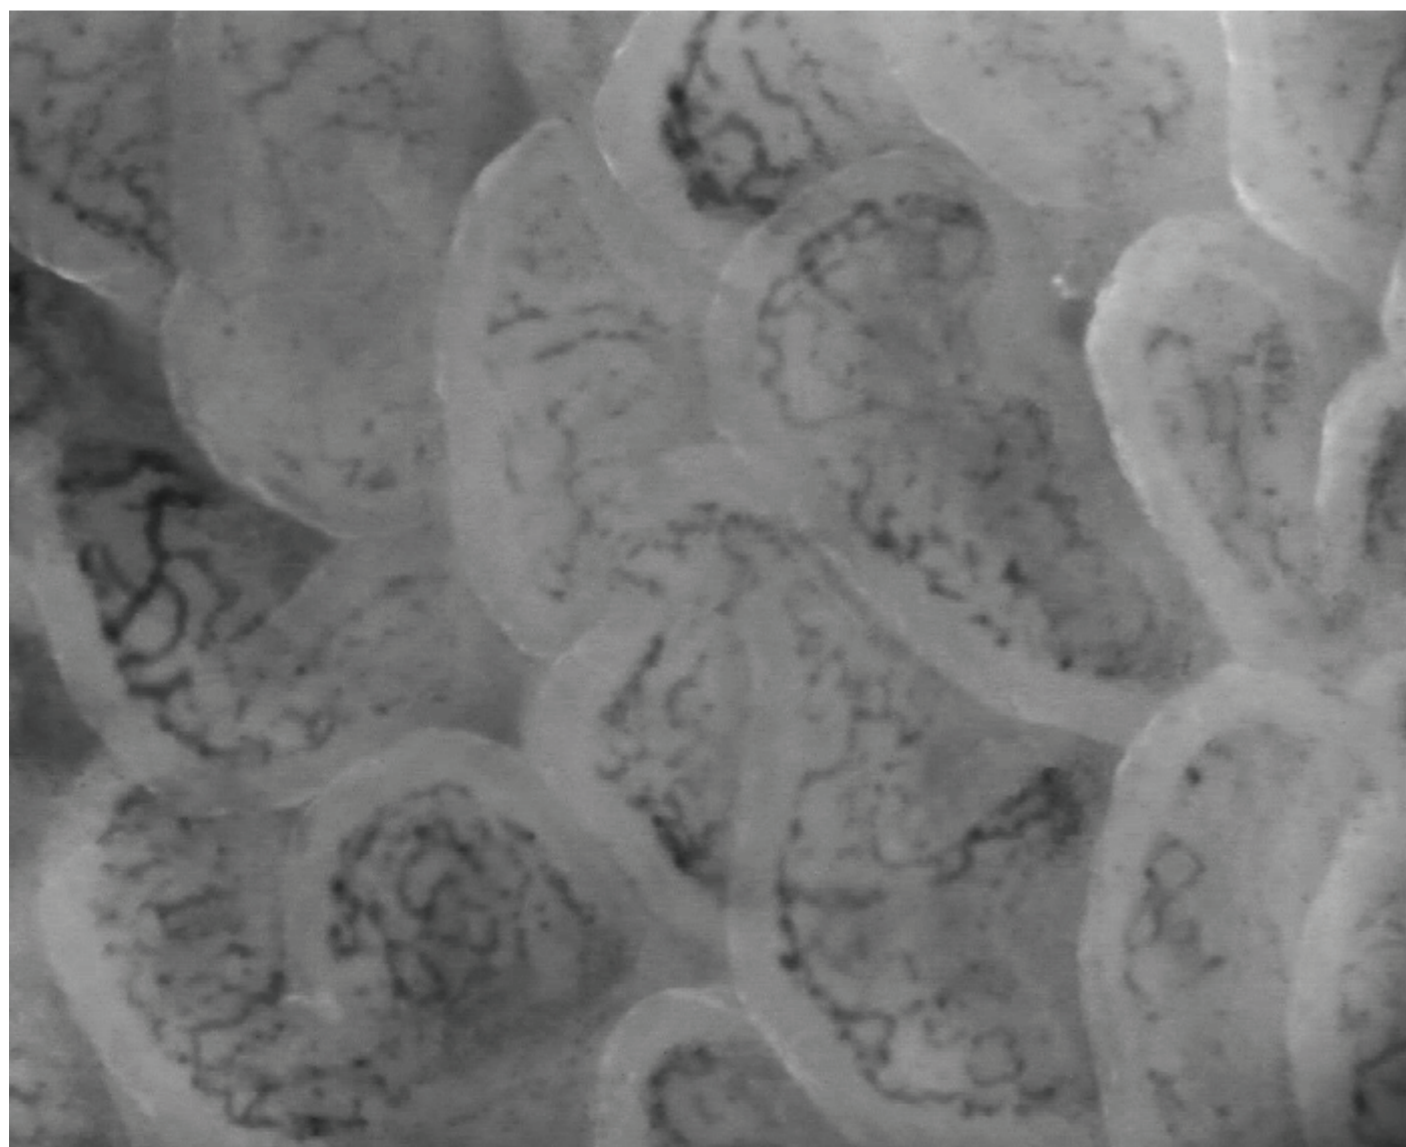

**C**

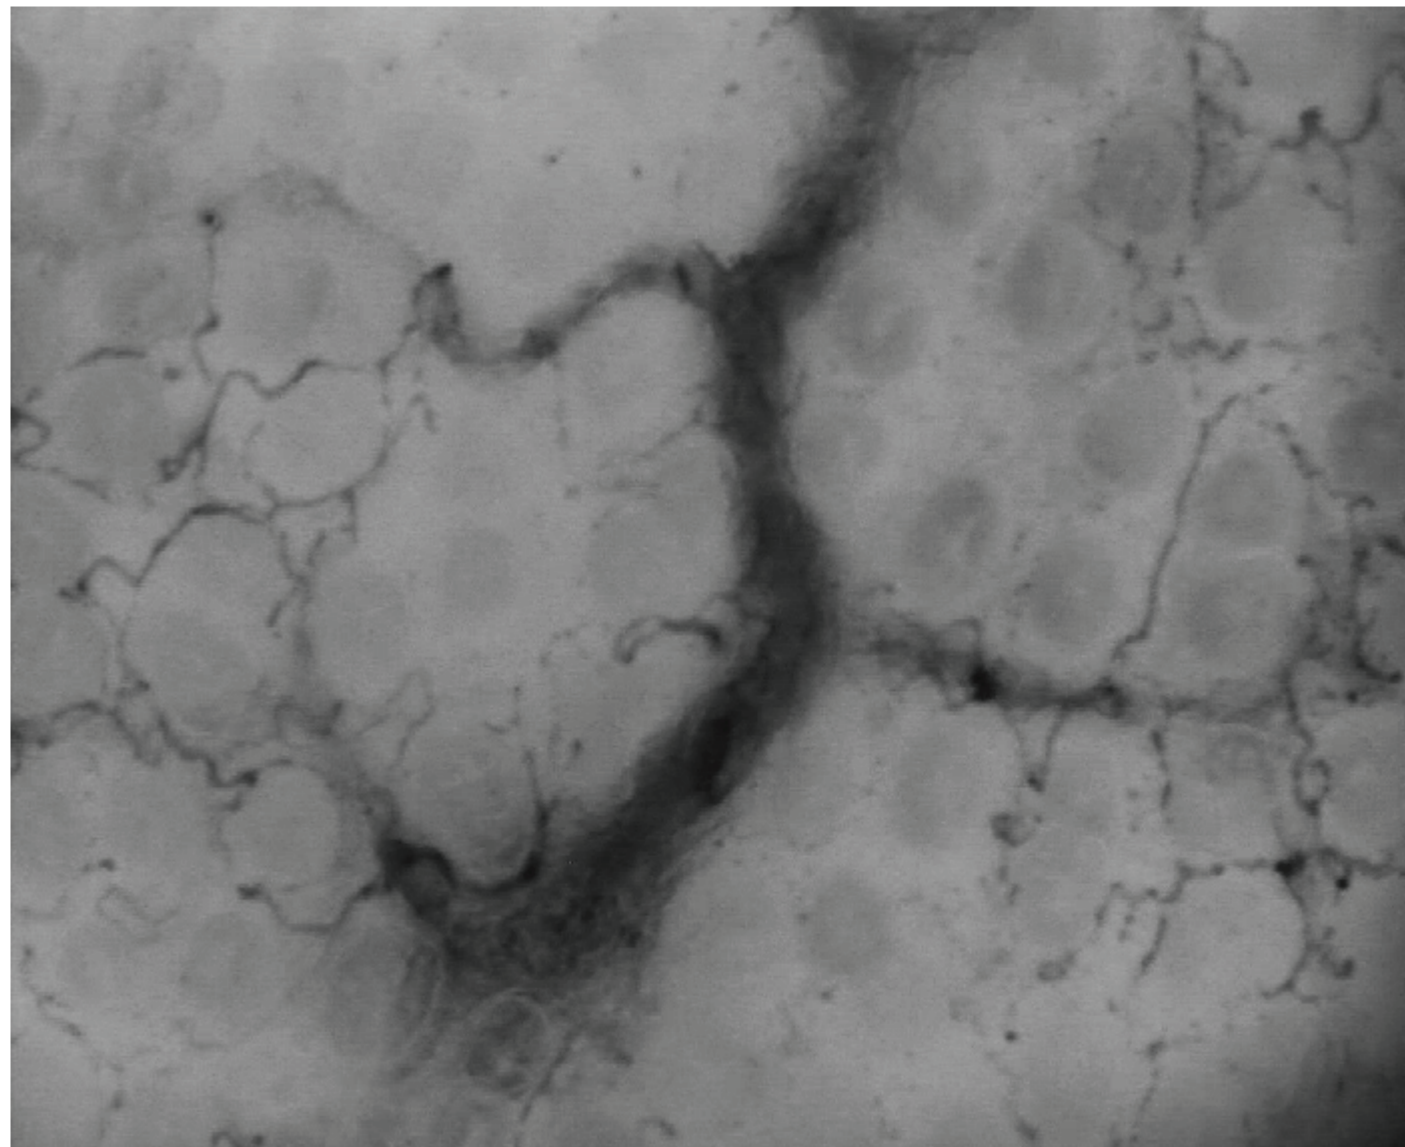

**D**

Supplement: MOESM6 [file 9708802]
